# Supplementary material for: Unveiling the Ability of Witch Hazel (Hamamelis virginiana L.) Bark Extract to Impair Keratinocyte Inflammatory Cascade Typical of Atopic Eczema
Source: MDPI journal article supplement (doi:10.3390/ijms23169279), 2022-08-17

Supplementary material

**Figure S1.** Immunofluorescence images reporting the effect of HVE and HT treatment (24h) on the impairment of involucrin (IVN) expression induced by IL-4 (100 ng/mL) in differentiated HaCaT cells. HVE, *Hamamelis virginiana* bark extract; HT, hamamelitannin. Green, IVN staining; blue, DAPI (nuclei) staining.

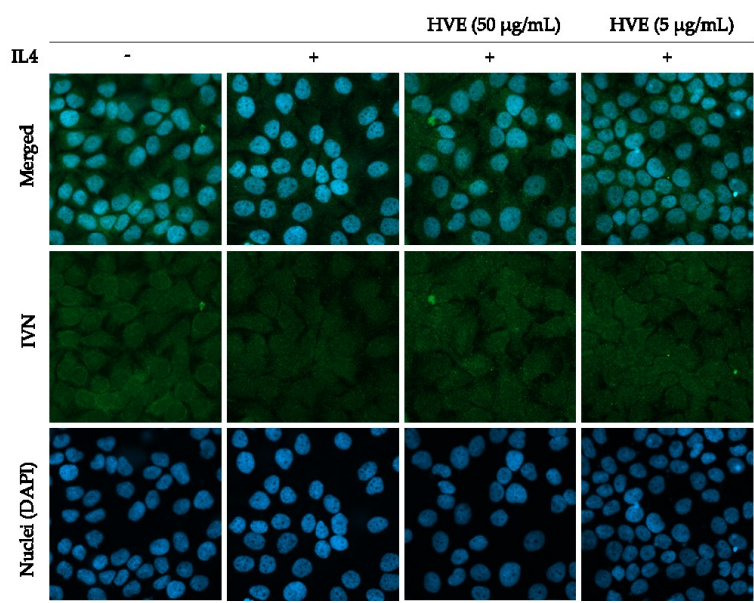

Supplement: s1 [file s1]
